# Supplementary material
Source: PubMed Central journal article supplement (PMC2409274)
Supplement: NIHMS41219-supplement-supplement_1.pdf [file NIHMS41219-supplement-supplement_1.pdf]

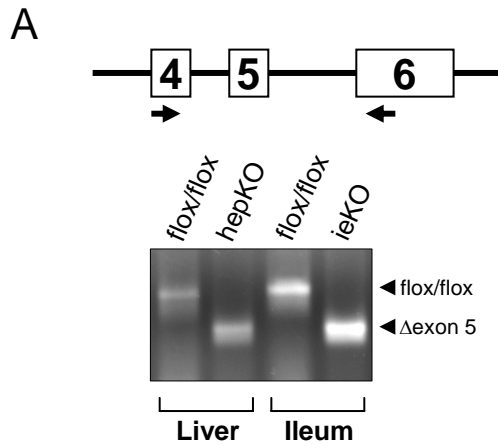

**B**

```

atgtctgctagtttgatactggagatthttcaagaatttcttaagcatggacttacagct
M S A S L D T G D F Q E F L K H G L T A
attgctctgcaccaggtcagagactcgccactccccaaacgtgaggaacaactccgg
I A S A P G S E T R H S P K R E E Q L R
gaaaaacgtgctgggcttccggaccgacaccgacgccccattcccgcccgcagccgctt
E K R A G L P D R H R R P I P A R S R L
gtcatgctgccccaaagtggagacggaagcccaggactggtccgatcgcatggggaacag
V M L P K V E T E A P G L V R S H G E Q
gggcagatgccagaaaacatgcaagtgtctcaattttaaagtgtgaattactcctatgat
G Q M P E N M Q V S Q F K M V N Y S Y D
gaagatctggaagagctatgtcctgtgtgtggcgataaagtgtctgggtaccattacggt
E D L E E L C P V C G D K V S G Y H Y G
ctcctcacgtgcgaaagctgcaagccgtaagagccgaccgcatgcgagggggcagaaata
L L T C E S C K P *

```

**Supplementary Table 1: Summary of LC/MS parameters used to measure bile acids**

| Compound                  | Retention Time (min) | Ion Monitored [M-H] <sup>-</sup> (m/z) |
|---------------------------|----------------------|----------------------------------------|
| <b>Taurine-Conjugates</b> |                      |                                        |
| tLCA                      | 10.8                 | 482                                    |
| tUDCA                     | 4.1                  | 498                                    |
| tHDCA                     | 4.4                  | 498                                    |
| tCDCA                     | 7.3                  | 498                                    |
| tDCA                      | 8.0                  | 498                                    |
| tα-MCA                    | 3.5                  | 514                                    |
| tβ-MCA                    | 3.5                  | 514                                    |
| tω-MCA                    | 3.5                  | 514                                    |
| tHCA                      | 4.1                  | 514                                    |
| tCA                       | 5.2                  | 514                                    |
| tLCA-3-SO <sub>4</sub>    | 4.0                  | 562                                    |
| <b>Unconjugated</b>       |                      |                                        |
| LCA                       | 22.4                 | 375                                    |
| Murocholic acid           | 7.8                  | 391                                    |
| UDCA                      | 9.1                  | 391                                    |
| HDCA                      | 10.7                 | 391                                    |
| CDCA                      | 17.3                 | 391                                    |
| DCA                       | 18.0                 | 391                                    |
| CDCA-D <sub>4</sub>       | 17.3                 | 395                                    |
| β-MCA                     | 7.4                  | 407                                    |
| ω-MCA                     | 7.0                  | 407                                    |
| α-MCA                     | 7.0                  | 407                                    |
| CA                        | 11.8                 | 407                                    |
| LCA-3-SO <sub>4</sub>     | 10.8                 | 455                                    |

LCA, lithocholic acid; UDCA, ursodeoxycholic acid; HDCA, hyodeoxycholic acid; CDCA, chenodeoxycholic acid; DCA, deoxycholic acid; MCA, muricholic acid; HCA, hyocholic acid; CA, cholic acid.

**Supplementary Table 2. RT-qPCR primer sequences**

| <b>Genes</b>  | <b>Accession number</b> | <b>Forward Primer</b>       | <b>Reverse Primer</b>     |
|---------------|-------------------------|-----------------------------|---------------------------|
| ABCG5         | AF312713                | TCAATGAGTTTTACGGCCTGAA      | GCACATCGGGTGATTTAGCA      |
| ABCG8         | AF324495                | TGCCCACCTTCCACATGTC         | ATGAAGCCGGCAGTAAGGTAGA    |
| APOA1         | NM_009692               | TCCTCCTTGGGCCAACA           | GAACCCAGAGTGTCACAGTTT     |
| ASBT          | NM_011388               | TGACTCGGGAACGATTGTG         | GGAATAACAAGAGCAACCAGAGAA  |
| BSEP          | NM_021022               | AAGCTACATCTGCCTTAGACACAGAA  | CAATACAGGTCCGACCCTCTCT    |
| MYC           | NM_010849               | CACCACCAGCAGCGACTCT         | CCACAGACACCACATCAATTTCTT  |
| CCND1         | BC044841                | GCCGAGAAGTTGTGCATCTACA      | TGTTCCACCAGAAGCAGTTCCATT  |
| CCNE1         | X75888                  | CCAAGATTGACAAGACTGTGAAAA    | GGTCCACGCATGCTGAATTA      |
| CYP27A1       | NM_024264               | GCCTCACCTATGGGATCTTCA       | TCAAAGCCTGACGCAGATG       |
| CYP7A1        | L23754                  | AGCAACTAAACAACCTGCCAGTACTA  | GTCCGGATATTCAAGGATGCA     |
| CYP7B1        | NM_007825               | TAGCCCTCTTTCCTCCACTCATA     | GAACCGATCGAACCTAAATTCCT   |
| CYP8B1        | AF090317                | GCCTTCAAGTATGATCGGTTCTT     | GATCTTCTGCCCAGCTTGTAGA    |
| FGF15         | NM_008003               | ACGGGCTGATTTCGCTACTC        | TGTAGCCTAAACAGTCCATTTCTT  |
| FXR           | NM_009108               | TCCGGACATTCAACCATCAC        | TACTGCACATCCCAGATCTC      |
| HMGCR         | XM_127496               | CTTGTGGAATGCCTTGTGATTG      | AGCCGAAGCAGCACATGAT       |
| HMGCS1        | NM_145942               | GCCGTGAACTGGGTCGAA          | GCATATATAGCAATGTCTCCTGCAA |
| HNF4 $\alpha$ | NM_008261               | ACCAAGAGGTCCATGGTGTTT       | GTGCCGAGGGACGATGTAG       |
| IBABP         | NM_008375               | TTGAGAGTGAGAAGAATTACGATGAGT | TTTCAATCACGTCTCCTGGAA     |
| LRH-1         | NM_030676               | GAAGTGTCCAAAACCAAAAAAGG     | CGTTTTCTCTGCGTTTTGTCA     |
| MDR2          | NM_008830               | CTTGAGGCAGCGAGAAATG         | GGTTGCTGATGCTGCCTAGT      |
| MRP2          | AF282773                | GCTGGGAGAAATGGAGAATGT       | ACTGCTGAGGGACGTAGGCTAT    |
| MRP3          | NM_029600               | AGCTGGGCTCCAAGTTCTG         | GTGTGAGGTCCGGAGTGTTG      |
| NTCP          | U95131                  | GAAGTCCAAAAGGCCACACTATGT    | ACAGCCACAGAGAGGGAGAAAG    |
| OST $\alpha$  | NM_145932               | AACAGAACATGGGATCCAAGTTT     | CAGGGCGGTCAGGATGA         |
| OST $\beta$   | NM_178933               | GACAAGCATGTTCTCCTGAGA       | TGTCTTGTGGCTGCTTCTTTC     |
| SHP           | NM_011850               | CGATCCTCTTCAACCCAGATG       | AGGGCTCCAAGACTTCACACA     |
| SCARB1        | BC004656                | TCCCCATGAACTGTTCTGTGAA      | TGCCCGATGCCCTTGA          |
| 18S           | M10098                  | ACCGCAGCTAGGAATAATGGA       | GCCTCAGTTCCGAAAACCA       |
| Cyclophilin   | NM_011149               | GGAGATGGCACAGGAGGAA         | GCCCAGTAGTCTTCAGCTT       |
